# Immune Responses Accelerate Ageing: Proof-of-Principle in an Insect Model

E. Rhiannon Pursall<sup>1\*</sup>, Jens Rolff<sup>2\*</sup>

**1** School of Biosciences, University of Birmingham, Birmingham, United Kingdom, **2** Department of Animal and Plant Sciences, University of Sheffield, Sheffield, United Kingdom

## Abstract

The pathology of many of the world's most important infectious diseases is caused by the immune response. Additionally age-related disease is often attributed to inflammatory responses. Consequently a reduction in infections and hence inflammation early in life has been hypothesized to explain the rise in lifespan in industrialized societies. Here we demonstrate experimentally for the first time that eliciting an immune response early in life accelerates ageing. We use the beetle *Tenebrio molitor* as an inflammation model. We provide a proof of principle for the effects of early infection on morbidity late in life and demonstrate a long-lasting cost of immunopathology. Along with presenting a proof-of-principle study, we discuss a mechanism for the apparently counter-adaptive persistence of immunopathology in natural populations. If immunopathology from early immune response only becomes costly later in life, natural selection on reducing self-harm would be relaxed, which could explain the presence of immune self-harm in nature.

**Citation:** Pursall ER, Rolff J (2011) Immune Responses Accelerate Ageing: Proof-of-Principle in an Insect Model. PLoS ONE 6(5): e19972. doi:10.1371/journal.pone.0019972

**Editor:** Mauricio Rojas, University of Pittsburgh, United States of America

**Received:** December 1, 2010; **Accepted:** April 21, 2011; **Published:** May 18, 2011

**Copyright:** © 2011 Pursall, Rolff. This is an open-access article distributed under the terms of the Creative Commons Attribution License, which permits unrestricted use, distribution, and reproduction in any medium, provided the original author and source are credited.

**Funding:** Biotechnology and Biological Sciences Research Council (BBSRC) funded this research. The funders had no role in study design, data collection and analysis, decision to publish, or preparation of the manuscript.

**Competing Interests:** The authors have declared that no competing interests exist.

\* E-mail: r.pursall@bham.ac.uk (ERP); jor@sheffield.ac.uk (JOR)

## Introduction

Inflammation has long-lasting health implications. Tissues express the inflammatory response following trauma or infection, providing the innate immune system's first response to insult. In the short term, inflammation constitutes a vital response to immune injury as it is the key component of tissue repair and reinstates physiological homeostasis [1]. However the initial acute inflammatory response can develop into a chronic condition if tissue health is not restored or irritation to the immune system is maintained [2]. Exposure to inflammation has therefore been linked to many diseases (reviewed in [3]), in which cases the inflammatory process can cause more harm than the initial immune insult [4]. In fact, the severity of many of the world's most important infectious diseases can largely be attributed to the immunopathology of inflammation [5]. In addition, diseases caused by inflammation are often associated with ageing, when disease symptoms are not expressed until many years after the initial inflammatory response [6]. These include cardiovascular disease [7], cancer [8] and metabolic diseases [3].

Recently Caleb Finch and Eileen Crimmins [9,10] proposed that a reduction in lifetime exposure to infectious disease and subsequent reduced inflammation causes a decline in age-related adult disease, i.e. a direct link between immunopathology encountered in early life and a decrease in adulthood morbidity and mortality. Most studies supporting this hypothesis have been of epidemiological, correlational nature, and lack hypothesis-driven experimental evidence. Experimental animal studies provide very powerful means by which to investigate the mechanisms controlling how environments in early life impact

on phenotype expression in human adulthood [11,12]. As insect immunity also causes inflammation and immunopathology [13,14], we have conducted a proof-of-principle study using the mealworm beetle *Tenebrio molitor*. The similarities between the underlying mechanisms of the insect and human innate immune systems [15] have encouraged and confirmed the importance of, the use of insect model systems in immunology. In *T. molitor* it has been shown that an immune response leads to the damage of vital organs, Malpighian tubules, which function equivalent to the kidneys of vertebrates [16].

Moreover, during the pupal phase of development in *T. molitor* a substantial proportion of the body is reconstructed: almost all larval tissues get completely dissolved and remodelled. Most of the gut is reconstructed during metamorphosis and shows different larval versus adult morphologies, but the Malpighian tubules are an exception and remain as intact structures [17,18,19,20]. This allows us to exclude damage to other tissues as an underlying cause of ageing phenotypes if the timing of the treatment shortly before or after pupation does not affect aging rate. Taken together, we have a model system where inflammatory damage to an organ system has been demonstrated [16] and because the study was designed to specifically test the impact of inflammation experienced either before or after complete metamorphosis, we can investigate damage to Malpighian tubules as a candidate mechanism.

Here, we investigate whether experimental activation of immune response early in life affects ageing measured as maximum lifespan. To measure the costs of immune activation and inflammation without any concurrent cost of infection, we activated the immune system at an early life stage with two non-

infectious antigens: heat-killed bacteria (*Serratia marcescens*) and nylon filament, both of which elicit an immune response [21,22]. Animals were challenged either at the larval stage, 70 days post-hatching, or the adult stage, 8 days post-adult-eclosion. The procedural controls received an injection with sterile insect ringer, and full controls were not subjected to any immune injury. We analysed maximum lifespan to specifically measure aging [23,24], and also median lifespan.

## Results

### Maximum lifespan

Early-life immune response accelerated ageing, as shown by a reduction in maximum lifespan. The maximum lifespan value for each experimental group was below that of the Control group (Table 1). Each group had a different maximum lifespan as the 90<sup>th</sup> percentile of survival time was calculated for each group separately.

In order to test for differences in maximum lifespan between experimental groups, the 90<sup>th</sup> percentile of overall survival time when all groups were combined were calculated. This value was 219 days. The percentage of each group reaching this maximum lifespan was compared to the percentage of the control (Fig. 1). An Exact Unconditional z-pooled test, which is argued to be more powerful for comparing two populations than the standard unconditional tests (Berger, 1996), was used to compare percentages. All experimental groups that had been immune challenged early in life exhibited significantly shorter maximum lifespan than the control group (percentage of individuals reaching 219 days was significantly lower,  $P < 0.03$  in all cases, Table 2). Pooling all immune challenged groups, i.e. larval or adult challenge with either nylon or bacteria, and comparing them to the pooled procedural control, showed a significant effect of immune challenge on shortening maximum lifespan (Exact Unconditional Independence Test: Test Statistic =  $-2.60$ ,  $P = 0.01$ ). The effect of accelerated ageing was seen in all immune-challenged groups, independent of whether the immune response was elicited before or after pupation. Differences between groups challenged either before or after pupation were non-significant ( $P > 0.5$  in all comparisons).

### Median lifespan

The analysis of median lifespan using the accelerated failure time model showed the same overall directional pattern as maximum lifespan – full controls had the longest lifespan, followed by both procedural control groups, and the four immune challenged groups

suffered the shortest lifespan (Fig. 2, table 3). The c-parameter, which is a treatment effect averaged among all survival time quantiles (i.e. the shift of the survival curve), was consistently lower when experimental treatments were compared against the control (Fig. 2). As a reference point, a treatment effect was calculated when control is compared against itself, and this value was the highest on the y-axis, confirming that early-life immune response initiates a reduction in median lifespan. Confidence intervals for these treatment effects did not overlap with the intervals of the control ‘reference point’ treatment effect (Table 3).

In the overall pooled comparison, procedural controls did not differ from immune challenged groups in median lifespan (Exact Unconditional Test: test statistic =  $-0.02$ ,  $P = 0.49$ ), unlike in maximum lifespan. However, compared to full controls there was significantly reduced median lifespan in individuals treated with either the control injection or immune antigens when all immune challenged and procedural control groups were pooled together (Chi-Squared Test:  $\chi^2 = 13.68$ ,  $P = 0.0002$ ).

### Physiological condition in mid-adult life

In a study that closely mirrored the experimental procedures of the main study presented here, we asked if the results could be driven by a resource trade-off. Our data do not show an indication of such a trade-off as levels of the enzyme phenoloxidase in the mid-adult stage were not affected by early-life immune challenge (ANOVA:  $F = 0.5727$ ;  $df = 4$ ;  $P = 0.6828$ ; Fig. 3).

## Discussion

The same ageing phenotype – a reduction in median and maximum lifespan – is observed when an immune insult is generated by a variety of different antigens, either before or after metamorphosis. This proof-of-principle that early-life inflammation causes reduced adult survival is important for two types of study that have covered this topic; firstly, clinical experiments indicating links between inflammation and adult disease [3,7,25,26,27,28,29] and secondly, studies showing that birth cohorts experiencing high levels of early-life mortality also experience reduced lifespan [6,30,31].

We also investigated the notion that the aging phenotypes could be caused by a resource trade-off investigating the role of phenoloxidase, a crucial component of the innate immune system. Briefly, this is an enzyme involved in two major processes; i) the catalisation of the oxidation of tyrosine to 3,4-dihydroxyphenylalanine; and ii) melanisation [32]. It also has been demonstrated to be condition dependent ([33]). Our results indicate that immune challenges did not cause phenoloxidase to be upregulated in the long term. This is in concordance with previous experimentation showing that *Tenebrio molitor* immune response ceases 28 days following infection [34].

The phenoloxidase response is associated with tissue damage in *Tenebrio molitor* [16]. Since phenoloxidase levels in our study did not appear to be upregulated in the long-term, we can confidently hypothesise that the observed lifespan reduction was not caused by repeated tissue damage from persistent phenoloxidase. Instead, we suggest that immunopathological damage suffered at the time of inflammation and expressed later in life is the parsimonious explanation for our findings. In support of this the experimental procedure elicited an immune response without a living pathogen. Moreover, the effects of immune response were delayed, with the first mortality detected 64 days following infection (Figure S1).

Further evidence to support our hypothesis that immunopathology is an important mechanism behind the long-term cost of early-life inflammation comes from our investigation into the

**Table 1.** 90<sup>th</sup> percentile survival times for each experimental group.

| Treatment Group       | Maximum Lifespan: 90 <sup>th</sup> Percentile Survival Time (Days) |
|-----------------------|--------------------------------------------------------------------|
| Control               | 224                                                                |
| Procedural Control 1  | 219                                                                |
| Procedural Control 2  | 218                                                                |
| Nylon Larval Stage    | 205                                                                |
| Nylon Adult Stage     | 198                                                                |
| Bacteria Larval Stage | 195                                                                |
| Bacteria Adult Stage  | 193                                                                |

(Groups are listed in descending order of maximum lifespan).

doi:10.1371/journal.pone.0019972.t001

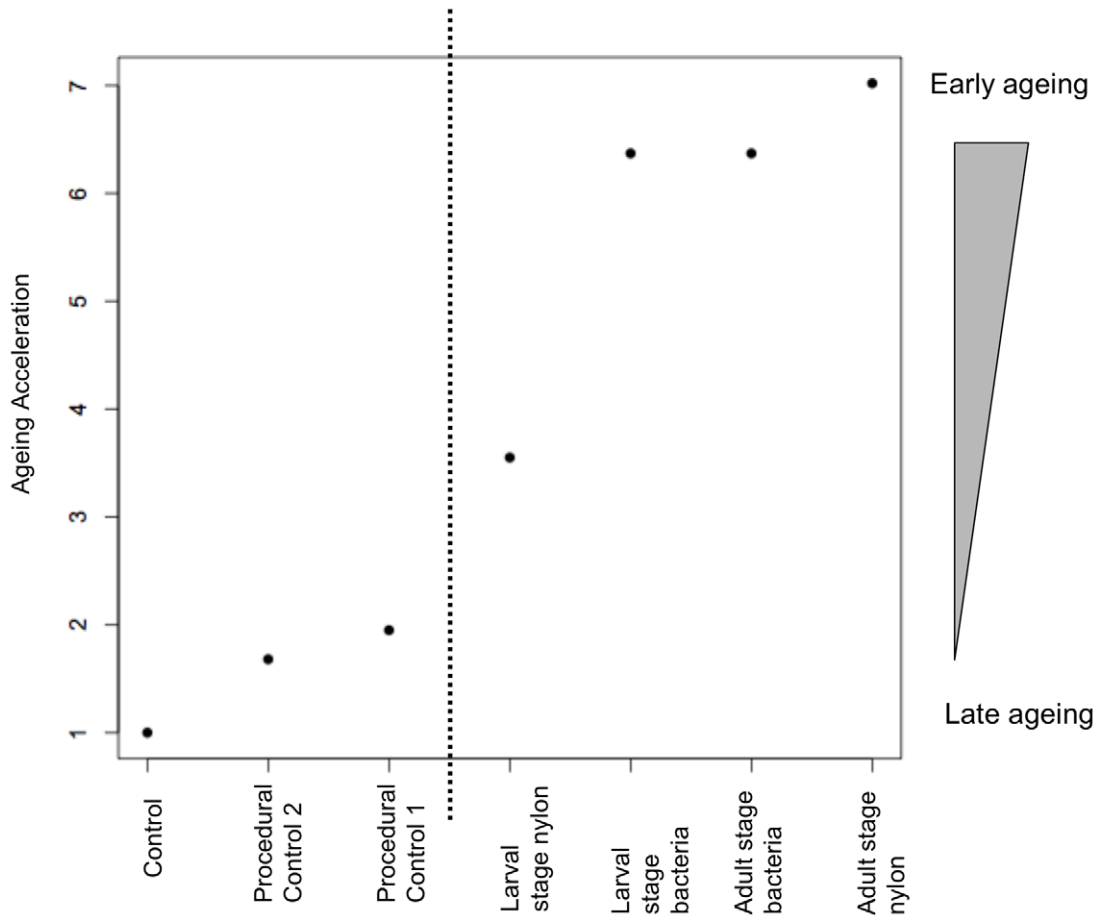

**Figure 1. Early-life immune challenge accelerates ageing.** 'Ageing acceleration' on the y-axis represents the reduction in maximum lifespan caused by the treatments (the percentage of survivors to the 90<sup>th</sup> percentile in the control group/the percentage of survivors to the 90<sup>th</sup> percentile in the treatment group). The dashed line represents the point at which the difference in aging acceleration between Control and experimental groups becomes statistically significant. Control n = 133; Procedural Control 1 n = 69; Procedural Control 2 n = 62; Nylon Larval Stage n = 97; Bacteria Adult Stage n = 29; Bacteria Larval Stage n = 58; Nylon Adult Stage n = 32. Experimental groups were as follows: Control = no experimental manipulation in larval or adult stage; Procedural Control 2 = injection with sterile insect ringer in larval stage only; Procedural Control 1 = injection with sterile insect ringer in both larval and adult stage; Larval stage nylon = insertion of nylon filament in larval stage, and injection of sterile insect ringer in adult stage; Larval stage bacteria = injection of dead bacteria in larval stage, and injection of sterile insect ringer in adult stage; Adult stage bacteria = injection of sterile insect ringer at larval stage and injection of dead bacteria in adult stage; Adult stage nylon = injection of sterile insect ringer in larval stage and insertion of nylon filament in adult stage.  
doi:10.1371/journal.pone.0019972.g001

timing of infection. Eliciting immune response before or after complete metamorphosis did not affect the results. This may suggest that inflammation-associated tissue damage contributing to

lifespan reduction is carried through complete metamorphosis. In support of this, Malpighian tubules have been shown to be particularly sensitive to immunopathology in *T. molitor*, suffering

**Table 2.** Maximum lifespan analysis using Exact Unconditional Independence (z-pooled) test.

| Comparison      | Treatment Effect | Test Statistic | Exact Unconditional (z-pooled) P-value |
|-----------------|------------------|----------------|----------------------------------------|
| Control vs. PC1 | 1.68             | -1.54          | 0.128                                  |
| Control vs. PC2 | 1.95             | -1.78          | 0.077                                  |
| Control vs. NLS | 3.55             | -3.28          | 0.002                                  |
| Control vs. BLS | 6.37             | -3.18          | 0.003                                  |
| Control vs. BAS | 6.37             | -2.32          | 0.028                                  |
| Control vs. NAS | 7.02             | -2.47          | 0.017                                  |

Treatment effects and p-values for comparing each group against Control, in terms of the proportion of individuals reaching 90<sup>th</sup> percentile of overall survival time (219 days). Treatment groups: PC1 = Procedural Control 1; PC2 = Procedural Control 2; NLS = Nylon Larval Stage; BLS = Bacteria Larval Stage; BAS = Bacteria Adult Stage; NAS = Bacteria Adult Stage.

doi:10.1371/journal.pone.0019972.t002

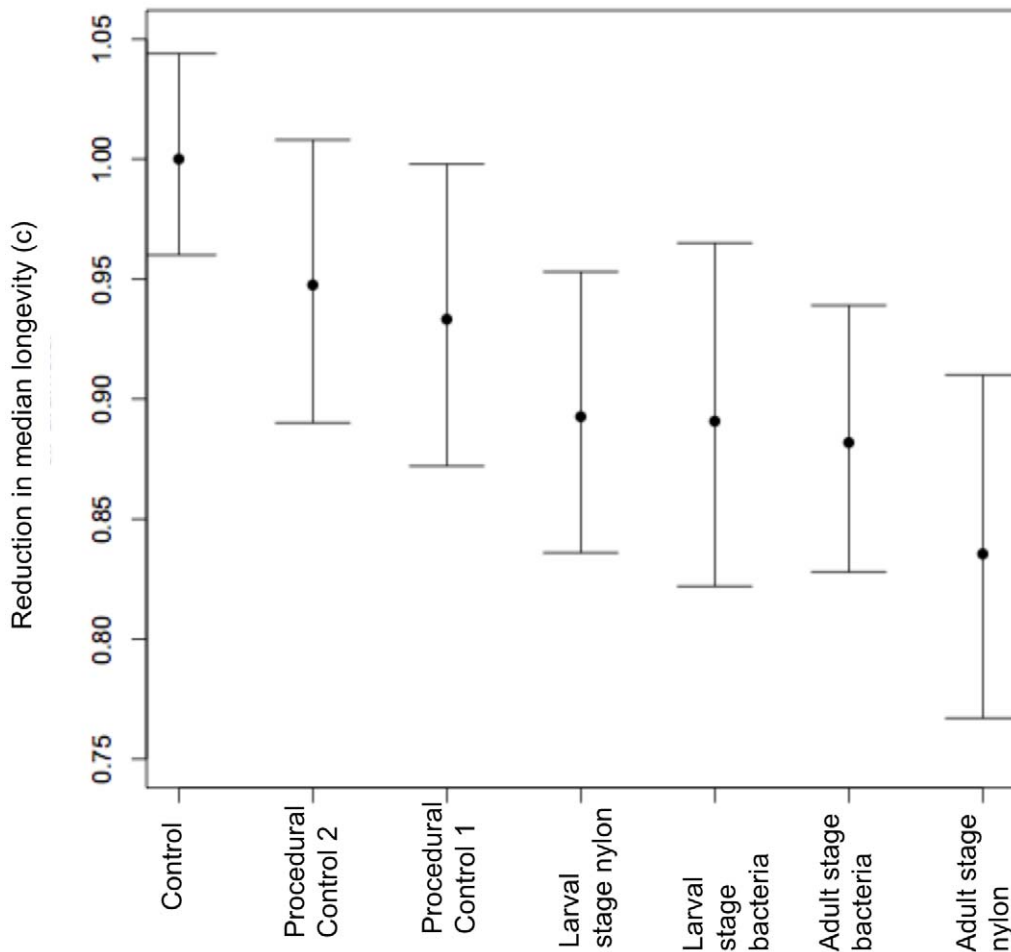

**Figure 2. Early-life immune challenge reduces median longevity.** Each c-parameter represents the percent difference in lifespan when each experimental group is compared with the control group, for any survival quantile. Error bars represent 95% confidence intervals. doi:10.1371/journal.pone.0019972.g002

reduction in functioning [16]. Malpighian tubules function as insect ‘kidneys’, and are among the organs of the insect body that are not completely reconstructed during metamorphosis from larva to adult [19,20].

We propose that an initial immune response and upregulation of phenoloxidase could have inflicted harm on Malpighian tubules that persisted into adult life and caused reduced lifespan. If this

were to indicate a general evolutionary mechanism, it is possible that the link between childhood inflammation and reduced lifespan observed by Finch and Crimmins [9] could be driven by immunopathological damage incurred during inflammation, the long-lasting effects of which are carried through to adulthood.

Whilst our data are consistent with the notion that early inflammation leads to increased aging mediated by innate responses, the question remains if this observation relates also to vertebrates. Vertebrates have a more complex immune system, the acquired immune system, yet inflammation and immunopathology in vertebrates has also been shown to be partly mediated by NF- $\kappa$ B mediated innate responses. The latter are highly conserved and form an important part of insect immunity ([35,36,37].

In an evolutionary context, we would like to argue that immunopathology could play a role in organisms in the wild. Costs of immune responses become exacerbated under environmental stress [38] and hence any effect on the aging phenotype will be shifted forward in an individual’s lifespan and become subject to natural selection. Moreover a recent study demonstrated for the first time that insect populations in the wild senesce, exhibiting age-dependent survivorship [39]. Alternatively, immunopathology could provide an explanation for the ‘paradox of aging science’ [40]: aging (i.e. reduction in maximum lifespan) is present in most species yet it directly opposes natural selection for maintenance systems. An immune response constitutes a trade-off between the

**Table 3. c-Parameter estimates and confidence intervals from AFT model. Data are displayed in descending order of c-Parameter.**

| Group                 | c-Parameter | Lower CI | Upper CI |
|-----------------------|-------------|----------|----------|
| Control               | 1.000       | 0.96     | 1.044    |
| Procedural Control 1  | 0.948       | 0.890    | 1.008    |
| Procedural Control 2  | 0.933       | 0.872    | 0.998    |
| Nylon Larval Stage    | 0.893       | 0.836    | 0.953    |
| Bacteria Adult Stage  | 0.891       | 0.822    | 0.965    |
| Bacteria Larval Stage | 0.882       | 0.828    | 0.939    |
| Nylon Adult Stage     | 0.836       | 0.767    | 0.910    |

doi:10.1371/journal.pone.0019972.t003

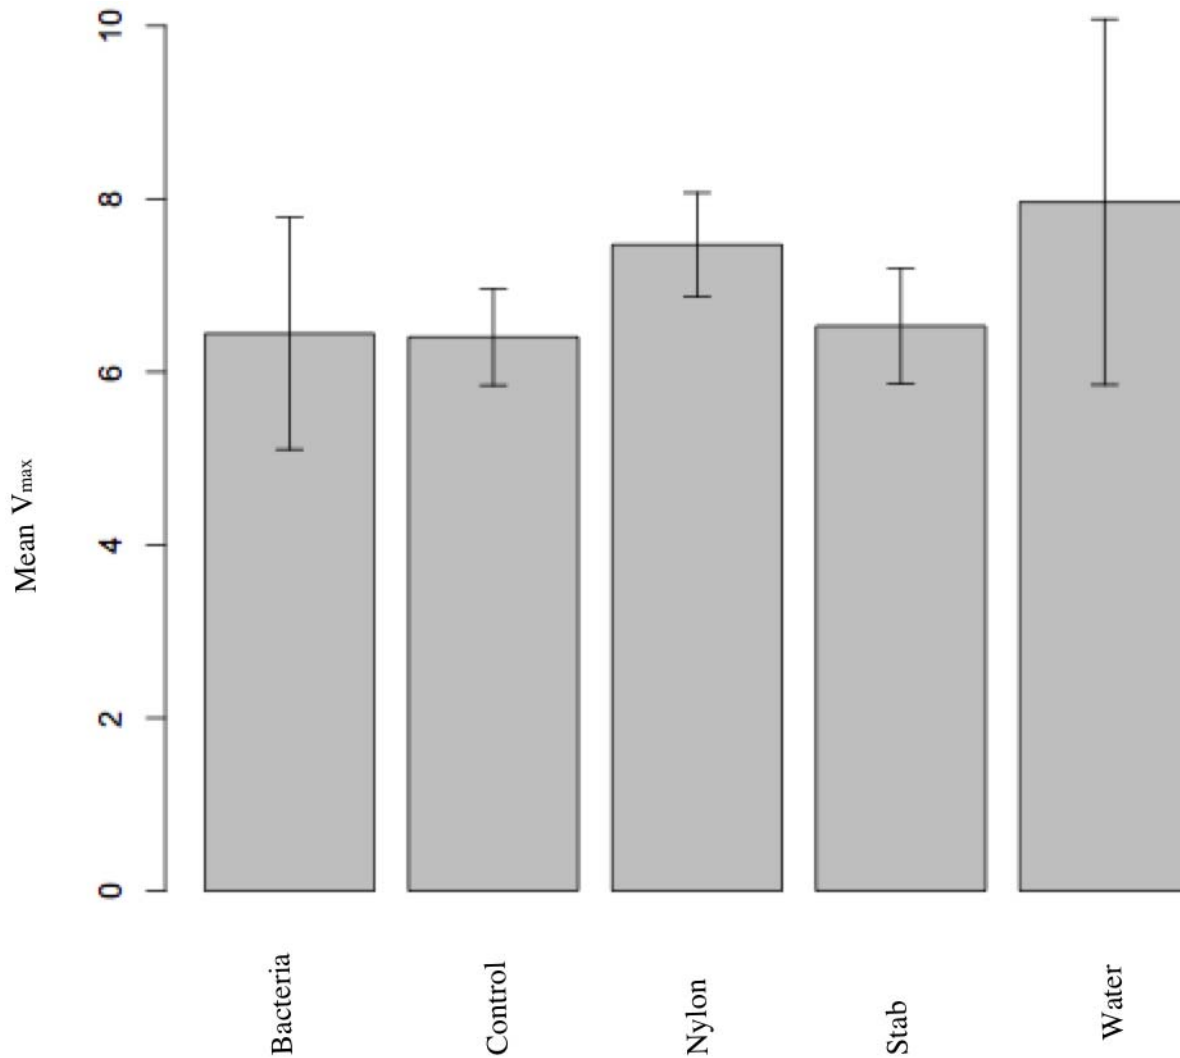

**Figure 3. Mean haemolymph phenoloxidase activity of different experimental groups, measured as mean  $V_{max}$ .** Error parts convey standard errors. Bacteria,  $n = 23$ ; Control,  $n = 76$ ; Nylon,  $n = 51$ ; Stab,  $n = 33$ ; Water,  $n = 23$ . doi:10.1371/journal.pone.0019972.g003

damage caused by a pathogen and self-harm. If the costs of self-harm only present at a later stage in life, and cause acceleration in aging but not a reduction in median lifespan, then natural selection on reducing self-harm will be weak.

## Materials and Methods

### Animal rearing

Pupae were collected from stock cultures maintained at  $25 \pm 2^\circ\text{C}$  with *ad libitum* supply of food and water. Following emergence and development to sexual maturity, adults were set up in mating pairs. The eggs from these mating events were to become experimental animals. During development, larvae were maintained at similar densities and with *ad libitum* access to food and water.

### Treatment groups

At day 70 post-hatch, larvae were taken from stock culture and placed in individual plastic cups. They were randomly assigned to one of four treatments; dead bacteria, nylon, procedural control or full control. Within these treatment groups, individuals were randomly assigned to one of two treatment stages; larval stage or

adult stage. Larval stage was day 70 post-hatch; adult stage was day 8 post-adult eclosion, at which stage individuals had reached sexual maturity. Full control individuals remained in their cups throughout the treatment period. After treatment, larvae were placed back into their cups and maintained at  $25 \pm 2^\circ\text{C}$  with *ad libitum* supply of food and water. Age at death was recorded.

The treatment groups were as follows:

Dead bacteria in larval stage; sterile ringer in adult stage  
 Nylon in larval stage; sterile ringer in adult stage  
 Sterile ringer in larval stage, sterile ringer in adult stage  
 Sterile ringer in larval stage; dead bacteria in adult stage  
 Sterile ringer in larval stage; nylon in adult stage  
 Sterile ringer in larval stage; no treatment in adult stage  
 No treatment in either stage (full control)

### Bacterial culturing

*Serratia marcescens* was taken from glycerol stocks and grown up overnight in Luria broth (tryptone 10 g, yeast extract 5 g, NaCl

10 g, H<sub>2</sub>O 1l). This culture was then spread over Luria agar plates and grown overnight. A single colony from this plate was grown overnight in another Luria broth culture. This culture was then killed by heat shock in a water bath and autoclaved.

### Dead bacteria experimental treatment

Before treatment, larvae and adults were chilled on ice for 5 minutes. 5  $\mu$ l of dead *Serratia marcescens* culture was pipetted onto parafilm, then taken up by a glass capillary. An incision was made in between the 3<sup>rd</sup> and 4<sup>th</sup> ventral abdominal sternites of experimental animals using a sterile 0.5 mm diameter needle. The bacterial culture was then expelled into the haemocoel. The dosage was approximately 3000 cells/5  $\mu$ l.

### Nylon experimental treatment

Animals were chilled prior to infection, and an incision on the ventral side of the body was made, as described for the dead bacteria treatment. A 2 mm  $\times$  0.16 mm piece of sterile nylon (Tenax) was inserted into the haemocoel through the incision.

### Sterile ringer treatment (procedural control)

Insect ringer (NaCl 128 mM, CaCl<sub>2</sub> 18 mM, KCl 1.3 mM, NaHCO<sub>3</sub> 2.3 mM) was pushed through a Sartorius Ministart RC 25 mm  $\times$  0.2  $\mu$ m filter. 5  $\mu$ l ringer was injected using the method described for the dead bacteria treatment.

### Phenoloxidase activity 4 weeks after challenge

*Tenebrio molitor* larvae at the final instar stage were obtained from Livefood ([www.livefoods.co.uk](http://www.livefoods.co.uk)) and maintained in stock cultures (>100 larvae per culture) with ad libitum access to food and water. Individuals from each stock culture were randomly assigned to each experimental group (Table S1). Following experimental treatment at the larval stage, animals were placed into individual plastic cups with ad libitum access to water in the form of potato chunks. Beetles remained in these plastic cups throughout the experiment. On the day of adult eclosion, food in the form of rat chow was added to the cup and maintained at ad libitum levels. Adult-stage stab treatments were administered 8 days following adult eclosion. These stabs were intended to mimic the fact that most groups in the experiments of the main study underwent an experimental procedure in the adult stage, and therefore the results from this experiment could potentially infer information about the patterns in phenoloxidase levels that may have occurred in the main study.

### Haemolymph removal

On day 30 post-adult eclosion, beetles were chilled and then stabbed in the soft cervical membrane between the head and thorax. Haemolymph was removed directly from the stab wound using a pipette (Gilson Pipetman P20) and immediately frozen at  $-90^{\circ}\text{C}$ . A minimum of 2  $\mu$ l of haemolymph was collected from each beetle: if the beetle failed to yield this amount, it was discarded from the experiment.

### Measurement of haemolymph phenoloxidase activity

The phenoloxidase assay from [34] was used. Reagents and reactions were kept chilled on ice at all times prior to spectrophotometric measurement. Haemolymph was defrosted on ice and diluted to a ratio of 1:20 neat haemolymph:phosphate-buffered saline (NaCl 150 mM; Na<sub>2</sub>HPO<sub>4</sub> 10 mM; pH 6.5). This mixture was then centrifuged at 12,200 rcf using an Eppendorf 5417R centrifuge. 8  $\mu$ l of the supernatant was added to a well on a

96-well spectrophotometer plate along with 56  $\mu$ l sterile distilled water and 8  $\mu$ l phosphate-buffered saline. Each well therefore contained a separate sample. L-DOPA (4 mg ml<sup>-1</sup>) was dissolved in sterile distilled water by mixing vigorously for at least 10 minutes. This concentration of L-DOPA has been previously shown to be a suitable concentration to use for the measurement of phenoloxidase activity in *Tenebrio molitor* haemolymph [34]. The solution was then pushed through a Sartorius Ministart RC 25 mm  $\times$  0.2  $\mu$ m filter to remove any remaining particles of L-DOPA. 8  $\mu$ l L-DOPA was added to each well on the plate, and the plate was immediately placed in a spectrophotometer (Molecular Devices VERSAmax) and the measurement started. The specific reaction in the spectrophotometer was as follows: 60-minute kinetic reaction, with readings every 15 seconds; plate mixed by shaking before each measurement; incubated at 30 $^{\circ}\text{C}$ . The rate at which phenoloxidase in each well converted to dopachrome was measured, and this enzyme activity was given in the form of Vmax, which directly correlated with the amount of phenoloxidase in the original haemolymph sample ([41]). For each sample, the reduced data was viewed in plot form on the spectrophotometer, and the Vmax over the period of time where the reaction proceeded in a straight line was taken. This was done to remove distortion of the results caused by periods of lag or levelling-off.

### Statistical analyses of maximum and median lifespan

The statistical package R was used for analysis. We examined the difference between each treatment group and control in terms of median and maximum lifespan. To examine median lifespan, we ran accelerated failure time models, with each model representing a treatment group compared to full control. This analysis was based on a paper by William Swindell [23]. The distribution to use in the AFT models was decided by producing parametric survival models for each comparison, with the following distributions: Weibull, Exponential, Lognormal and Gaussian. We then used analysis of variance to test which distribution minimised Akaike's Information Criterion, and was therefore the appropriate distribution to use [42]. For each comparison of experimental and control group, the Weibull distribution was appropriate (see table S2; plots available on request). Quantile-quantile plots of the data from each AFT model indicated that the effects treatment were not always consistent over time, because the data did not form straight lines. Therefore, we can say that the c-values generated by the AFT model represent effects of treatment on survival, averaged over survival time. Each model produced a c-parameter, which represented the difference in median lifespan between the two groups, and 95% confidence intervals for this value. A treatment effect was then calculated. A value of 1 represents a c-parameter when the full control group is compared against itself. Data from accelerated failure time models are presented in table 3. To examine maximum lifespan, we calculated the 90<sup>th</sup> percentile survival time when all treatment groups were combined. We then worked out the percentage of individuals in each treatment group surviving to this time. Exact unconditional tests, using a contingency table approach with the online calculator at [www.stat.ncsu.edu/exact](http://www.stat.ncsu.edu/exact), were used to compare percentage survival for control group with each treatment group in turn. This produced a score-test z-pooled p-value for each of the seven comparisons. To obtain the treatment effect, the percentage survival of the full control group was divided by that of the treatment group in each comparison. This maximum lifespan method was based on that used by references 23 and 24 and the data are displayed in table S3.

## Supporting Information

### Figure S1 Survival curves for each treatment group.

Dotted lines represent treatment groups that differed significantly from full controls ( $p < 0.05$ ), when compared using a parametric survival model with Weibull distributions. Treatment groups: black solid = Control; brown solid = Procedural Control 1; grey solid = Procedural Control 2; red dashed = Bacteria Larval Stage; blue dashed = Bacteria Adult Stage; green dashed = Nylon Larval Stage; yellow dashed = Nylon Adult Stage. (PPT)

**Table S1 Experimental groups.** See Materials and Methods Chapter for detail on experimental procedures and cohort design. ‘Larval stage’ refers to final instar before pupation; ‘adult stage’ refers to 8 days following adult eclosion. Stab and Water experimental groups are procedural controls for the two experimental groups, which are Bacteria and Nylon. (DOC)

**Table S2 Distributions of survival models.** Analysis of variance results when each experimental treatment was compared with control, using different distributions.  $-2*LL$  value is the Akaike’s Information Criterion. (DOC)

## References

- Vasto S, Candore G, Balistreri CR, Caruso M, Colonna-Romano G, et al. (2007) Inflammatory networks in ageing, age-related diseases and longevity. *Mech Ag Dev* 128: 83–91.
- Licastro F, Candore G, Lio D, Porcellini E, Colonna-Romano G, et al. (2005) Innate immunity and inflammation in ageing: a key for understanding age-related diseases. *Immun Ag* 2: 8–22.
- Hotamisligil GS (2006) Inflammation and metabolic disorders. *Nature* 444: 860–867.
- Nathan C (2002) Points of control in inflammation. *Nature* 420: 846–852.
- Graham A, Allen J, Read AF (2005) Evolutionary causes and consequences of immunopathology. *Ann Rev Ecol Evol System* 36: 373–397.
- Bengtsson T, Lindström M (2003) Airborne infectious diseases during infancy and mortality in later life in southern Sweden, 1766–1894. *Internat J Epidemiol* 32: 286–294.
- Libby P (2002) Inflammation and atherosclerosis. *Nature* 420: 868–874.
- Balkwill F, Mantovani A (2001) Inflammation and cancer: back to Virchow? *Lancet* 357: 539–545.
- Finch CE, Crimmins EM (2004) Inflammatory exposure and historical changes in human life-spans. *Science* 305: 1736–1739.
- Finch CE (2010) Evolution of the human lifespan and diseases of aging: Roles of infection, inflammation, and nutrition. *Proc Natl Acad Sci USA* 107: 1718–1724.
- Bateson P, Barker D, Clutton-Brock T, Deb D, D’Udine B, et al. (2004) Developmental plasticity and human health. *Nature* 340: 419–421.
- Waterland RA, Michels KB (2007) Epigenetic epidemiology of the developmental origins hypothesis. *Ann Rev Nutr* 27: 363–388.
- Brandt SM, Dionne MS, Khush RS, Pham LN, Vigdahl TJ, Schneider DS (2004) Secreted Bacterial Effectors and Host-Produced Eiger/TNF Drive Death in a *Salmonella*-Infected Fruit Fly. *PLoS Biol* 2: e418.
- Libert S, Chao Y, Chu X, Pletcher SD (2008) Trade-offs between longevity and pathogen resistance in *Drosophila melanogaster* are mediated by NF $\kappa$ B signaling. *Ag Cell* 5: 533–543.
- Hoffman JA, Kafatos FC, Janeway CA, Ezekowitz R (1999) Phylogenetic perspectives in innate immunity. *Science* 284: 1313–1318.
- Sadd BM, Siva-Jothy MT (2006) Self-harm caused by an insect’s innate immunity. *Proc Roy Soc Ser B* 273: 2571–2574.
- Ryerse JS (1979) Developmental changes in Malpighian tubule cell structure. *Tiss Cell* 11: 533–551.
- Wigglesworth VB (1965) *The Principles of Insect Physiology*. London: Methuen.
- Truman JW, Riddiford LM (1999) The origins of insect metamorphosis. *Nature* 401: 447–450.
- Singh SR, Liu W, Hou SX (2007) The Adult *Drosophila* Malpighian Tubules Are Maintained by Multipotent Stem Cells. *Cell Stem Cell* 1: 191–203.
- Armitage SAO, Thompson JJW, Rolff J, Siva-Jothy MT (2003) Examining costs of induced and constitutive immune investment in *Tenebrio molitor*. *J Evol Biol* 16: 1038–1044.
- Adamo SA (2004) Estimating disease resistance in insects: phenoloxidase and lysozyme-like activity and disease resistance in the cricket *Gryllus texensis*. *J Insect Physiol* 50: 209–216.
- Swindell WR (2009) Accelerated failure time models provide a useful statistical framework for aging research. *Exp Gerontol* 44: 190–200.
- Wang C, Li Q, Redden DT, Weindrich R, Allison DB (2004) Statistical methods for testing effects on “maximum lifespan”. *Mech Ag Dev* 125: 629–632.
- Choruzos G (1995) The Hypothalamic–Pituitary–Adrenal Axis and Immune-Mediated Inflammation. *New Engl J Med* 1995 332: 1351–1363.
- Ridker PM, Cushman M, Stampfer MJ, Tracy RP, Hennekens CH (1997) Inflammation, aspirin, and the risk of cardiovascular disease in apparently healthy men. *New Engl J Med* 337: 422–424.
- Sin DD, Man P (2003) Why are patients with chronic obstructive pulmonary disease at increased risk of cardiovascular diseases? *Circulation* 107: 1514–1519.
- Wellen KE, Hotamisligil GS (2005) Inflammation, stress and diabetes. *J Clin Invest* 115: 1111–1119.
- Ridker PM, Burning JE, Cook NR, Rifai N (2003) C-Reactive Protein, the Metabolic Syndrome, and Risk of Incident Cardiovascular Events. *Circulation* 107: 391–397.
- Gurven M, Kaplan H, Winking J, Finch C, Crimmins EM (2008) Aging and inflammation in two epidemiological worlds. *J Gerontol: Med Sci* 63A: 196–199.
- Catalano R, Bruckner T (2006) Child mortality and cohort lifespan: a test of diminished entelechy. *Int J Epidemiol* 35: 1264–1269.
- Cerenius L, Soderhall K (2004) The prophenoloxidase-activating system in invertebrates. *Immun Rev* 198: 116–126.
- Siva-Jothy MT, Thompson JJW (2002) Short-term nutrient deprivation affects immune function. *Physiol Entomol* 27: 206–212.
- Haïne ER, Moret Y, Siva-Jothy MT, Rolff J (2008) Antimicrobial defence and persistent infection in insects. *Science* 322: 257–1259.
- Sun S, Lindstrom I, Lee Y, Faye I (1991) Structure and expression of the attacin genes in *Hyalophora cecropia*. *Eur J Biochem* 196: 247–254.
- Broderick N, Welchman D, Lemaître B in *Insect Infection and Immunity* Rolff J, Reynolds S, eds. Oxford University Press, Oxford. 13 p.
- Medzhitov R, Preston-Hurlburt PP, Janeway CA, Jr. (1997) A human homologue of the *Drosophila* Toll protein signals activation of adaptive immunity. *Nature* 388: 394–397.
- Moret Y, Schmid-Hempel P (2000) Survival for Immunity: The Price of Immune System Activation for Bumblebee Workers. *Science* 290: 1166–1168.
- Sherratt TN, Laird RA, Hassall C, Lowe CD, Harvey IF, et al. (2010) Empirical evidence of senescence in adult damselflies (Odonata: Zygoptera). *J Anim Ecol* 79: 1034–1044.
- Kirkwood TBL (2005) Understanding the odd science of aging. *Cell* 120: 437–447.
- Thompson JJW (2002) Aspects of melanin production and immunity in the mealworm beetle, *Tenebrio molitor*. M. Phil. Thesis, University of Sheffield, Sheffield, UK.
- Akaike H (1974) A new look at the statistical model identification. *Institute of Electrical Electronics and Engineering Transactions on Automatic Control* 19: 716–723.

### Table S3 Delayed effects of immune response: earliest point of overall survival time at which groups begin to differ in survival.

P-values from Chi-squared analysis using 7X2 contingency table are shown. By the 9<sup>th</sup> quantile, 65 days, some experimental groups (nylon-challenged) have begun to differ significantly from other groups. Groups other than nylon, i.e. bacteria-challenged and procedural controls, did not differ significantly at day 69 (10<sup>th</sup> quantile of overall survival time) ( $P > 0.23$ ), but these groups did suffer significantly reduced survival by day 120 (20<sup>th</sup> quantile) ( $P < 0.05$ ). (DOC)

## Acknowledgments

We thank Klaus Reinhardt, Mike Siva-Jothy, Adam Dobson, and Simon Johnston for many valuable comments on the manuscript, Richard Naylor for technical support in the laboratory, and William Swindell for statistical advice.

## Author Contributions

Conceived and designed the experiments: ERP JOR. Performed the experiments: ERP. Analyzed the data: ERP JOR. Contributed reagents/materials/analysis tools: ERP JOR. Wrote the paper: ERP JOR.
